# Supplementary material for: The long-term safety of D-allulose administration in healthy dogs
Source: PubMed Central journal article supplement — J Vet Med Sci. 2017 Sep 17;79(11):1780–4. doi: 10.1292/jvms.17-0367 (PMC5709552; doi:10.1292/jvms.17-0367), 2017-09-17
Supplement: jvms-79-1780-s001.pdf [file jvms-79-1780-s001.pdf]

**Supplementary Table. Changes in hematological parameters in dogs before and after the 12-week administration of D-allulose**

| Parameters                                       | Groups     | Week 0             | Week 12            | Reference range |
|--------------------------------------------------|------------|--------------------|--------------------|-----------------|
| White blood cells ( $\times 10^3/\mu\text{l}$ )  | D-Allulose | 8.4 $\pm$ 1.9      | 9.4 $\pm$ 9.9      | 6.0-17.0        |
|                                                  | Control    | 8.2 $\pm$ 14.5     | 10.3 $\pm$ 9.5     |                 |
| Red blood cells ( $\times 10^6/\mu\text{l}$ )    | D-Allulose | 8.0 $\pm$ 0.3      | 7.4 $\pm$ 0.3      | 5.5-8.5         |
|                                                  | Control    | 7.5 $\pm$ 0.2      | 6.8 $\pm$ 0.3      |                 |
| Hemoglobin (g/dl)                                | D-Allulose | 18.6 $\pm$ 0.8     | 16.8 $\pm$ 0.6     | 12-18           |
|                                                  | Control    | 17.4 $\pm$ 0.4     | 15.7 $\pm$ 0.6     |                 |
| Hematocrit (%)                                   | D-Allulose | 53.7 $\pm$ 2.6     | 49.7 $\pm$ 1.3     | 37-55           |
|                                                  | Control    | 50.0 $\pm$ 1.4     | 47.2 $\pm$ 2.1     |                 |
| Mean corpuscular volume (fl)                     | D-Allulose | 67.0 $\pm$ 2.0     | 67.7 $\pm$ 1.8     | 60-77           |
|                                                  | Control    | 66.9 $\pm$ 0.7     | 69.0 $\pm$ 0.6     |                 |
| Mean cell hemoglobin (pg)                        | D-Allulose | 23.2 $\pm$ 0.8     | 22.8 $\pm$ 0.5     | 19.5-26.0       |
|                                                  | Control    | 23.3 $\pm$ 0.4     | 23.0 $\pm$ 0.4     |                 |
| Mean corpuscular hemoglobin concentration (g/dl) | D-Allulose | 34.6 $\pm$ 0.5     | 33.7 $\pm$ 0.4     | 32-36           |
|                                                  | Control    | 34.9 $\pm$ 0.5     | 33.4 $\pm$ 0.4     |                 |
| Platelet ( $\times 10^3/\mu\text{l}$ )           | D-Allulose | 398.2 $\pm$ 80.5 * | 332.4 $\pm$ 80.4 * | 200-400         |
|                                                  | Control    | 545.2 $\pm$ 75.0   | 483.8 $\pm$ 78.4   |                 |

Data were presented as the mean  $\pm$  SD of 5 dogs.

\*  $P < 0.05$  vs. the value in the control group

†  $P < 0.05$  vs. the value at the week 0
